# Supplementary material for: From Soil to Grape and Wine: Geographical Variations in Elemental Profiles in Different Chinese Regions
Source: MDPI journal article supplement (doi:10.3390/foods10123108), 2021-12-15
Supplement: s1 [file s1]

Supplemental Data:

Supplementary Table S1 Bioaccumulation factors of elements in system soil-grape.

| BAF | YL           | BLY         | HY           | XX          | MQ          | WH           |
|-----|--------------|-------------|--------------|-------------|-------------|--------------|
| Na  | <0.01b       | <0.01b      | <0.01b       | <0.01a      | <0.01a      | <0.01b       |
| Mg  | 0.03±0.01ab  | 0.02±0.01b  | 0.04±0.01a   | 0.04±0.01a  | 0.04±0.01a  | 0.04±0.01a   |
| K   | 0.10±0.01b   | 0.13±0.01a  | 0.13±0.01a   | 0.11±0.02ab | 0.10±0.02b  | 0.11±0.01ab  |
| Ca  | 0.01±0.01a   | 0.01±0.003a | 0.01±0.002a  | 0.01±0.002a | 0.01±0.003a | 0.01±0.004a  |
| Al  | <0.01b       | <0.01b      | <0.01a       | <0.01b      | <0.01b      | <0.01b       |
| Fe  | <0.01c       | <0.01c      | <0.01b       | <0.01bc     | <0.01a      | <0.01a       |
| Mn  | <0.01b       | <0.01c      | <0.01b       | <0.01a      | <0.01b      | <0.01b       |
| Cu  | 0.09±0.01abc | 0.06±0.01c  | 0.13±0.13abc | 0.18±0.09ab | 0.20±0.10a  | 0.14±0.02abc |
| Zn  | 0.02±0.003b  | 0.02±0.01ab | 0.02±0.01ab  | 0.03±0.01a  | 0.03±0.01a  | 0.03±0.01a   |
| Rb  | 0.23±0.10c   | 1.21±0.29a  | 0.47±0.20b   | 0.10±0.09c  | 0.07±0.03c  | 0.02±0.01c   |
| Sr  | <0.01c       | <0.01c      | <0.01c       | 0.03±0.007a | <0.01c      | 0.02±0.005b  |
| Li  | <0.01d       | <0.01e      | <0.01de      | <0.01c      | <0.01b      | <0.01a       |
| Cd  | <0.01a       | <0.01a      | <0.01b       | <0.01d      | <0.01bc     | <0.01cd      |
| Cs  | <0.01cd      | 0.01±0.004a | <0.01b       | <0.01bc     | <0.01cd     | <0.01d       |
| Ba  | 0.05±0.03a   | <0.01c      | 0.02±0.002b  | 0.05±0.02a  | 0.05±0.02a  | 0.04±0.01ab  |

Note: Different letters in the same row indicate statistically significantly different ( $P < 0.05$ ).

Supplementary Table S2 Pearson's correlation analysis of BCF values between the elements.

|    | Na      | Mg      | Al    | K       | Ca    | Mn      | Fe      | Cu     | Zn    | Rb      | Sr      | Li      | Cd    | Cs      | Ba |
|----|---------|---------|-------|---------|-------|---------|---------|--------|-------|---------|---------|---------|-------|---------|----|
| Na | 1       |         |       |         |       |         |         |        |       |         |         |         |       |         |    |
| Mg | .232    | 1       |       |         |       |         |         |        |       |         |         |         |       |         |    |
| Al | -.225   | .256    | 1     |         |       |         |         |        |       |         |         |         |       |         |    |
| K  | -.307   | -.037   | .342  | 1       |       |         |         |        |       |         |         |         |       |         |    |
| Ca | -.135   | .593**  | .015  | -.061   | 1     |         |         |        |       |         |         |         |       |         |    |
| Mn | .385*   | .571**  | .091  | -.069   | .250  | 1       |         |        |       |         |         |         |       |         |    |
| Fe | .315    | .539**  | .075  | -.109   | .284  | .038    | 1       |        |       |         |         |         |       |         |    |
| Cu | .418*   | .371*   | .107  | -.223   | .082  | .255    | .514**  | 1      |       |         |         |         |       |         |    |
| Zn | .344    | .533**  | -.188 | .063    | .420* | .212    | .585**  | .357   | 1     |         |         |         |       |         |    |
| Rb | -.480** | -.467** | .082  | .599**  | -.021 | -.511** | -.485** | -.451* | -.145 | 1       |         |         |       |         |    |
| Sr | .435*   | .370*   | -.255 | -.053   | .079  | .784**  | -.043   | .264   | .308  | -.446*  | 1       |         |       |         |    |
| Li | .061    | .455*   | -.206 | -.157   | .163  | .097    | .593**  | .277   | .347  | -.579** | .339    | 1       |       |         |    |
| Cd | -.433*  | -.574** | -.113 | -.129   | .030  | -.450*  | -.400*  | -.377* | -.312 | .440*   | -.603** | -.590** | 1     |         |    |
| Cs | -.298   | -.374*  | -.003 | .493**  | .025  | -.505** | -.217   | -.296  | .035  | .910**  | -.479** | -.503** | .353  | 1       |    |
| Ba | .312    | .551**  | -.071 | -.503** | .323  | .506**  | .283    | .374*  | .096  | -.657** | .335    | .279    | -.264 | -.618** | 1  |

Note: \* Correlation is significant at the 0.05 level.

\*\* Correlation is significant at the 0.01 level.

Supplementary Table S3 Transfer factors of elements in system wine-grape.

| TF | YL           | BLY         | HY          | XX         | MQ          | WH           |
|----|--------------|-------------|-------------|------------|-------------|--------------|
| Na | 1.89±0.16abc | 2.19±0.28ab | 1.53±0.19c  | 2.43±0.68a | 1.57±0.18bc | 2.04±0.19abc |
| Mg | 1.64±0.58a   | 1.46±0.19a  | 1.59±0.28a  | 1.43±0.16a | 1.71±0.36a  | 1.4±0.21a    |
| K  | 1.16±0.07b   | 0.98±0.05c  | 0.97±0.07c  | 1.33±0.1a  | 1.19±0.1b   | 0.86±0.06c   |
| Ca | 0.58±0.23a   | 0.63±0.13a  | 0.53±0.18a  | 0.35±0.1a  | 0.54±0.19a  | 0.4±0.1a     |
| Al | 0.29±0.03a   | 0.35±0.04a  | 0.3±0.09a   | 0.46±0.17a | 0.33±0.01a  | 0.42±0.22a   |
| Fe | 0.3±0.1a     | 0.23±0.11a  | 0.3±0.06a   | 0.35±0.07a | 0.27±0.04a  | 0.32±0.05a   |
| Mn | 0.54±0.12a   | 0.69±0.13a  | 0.58±0.13a  | 0.55±0.1a  | 0.8±0.15a   | 0.63±0.17a   |
| Cu | 0.09±0.01b   | 0.19±0.03a  | 0.12±0.06b  | 0.09±0.04b | 0.09±0.02b  | 0.15±0.02ab  |
| Zn | 1.15±0.21a   | 0.54±0.21b  | 1.04±0.3a   | 1.18±0.26a | 0.96±0.14a  | 0.85±0.18ab  |
| Rb | 0.83±0.14a   | 0.64±0.03a  | 0.6±0.05a   | 0.83±0.16a | 0.71±0.34a  | 0.76±0.24a   |
| Sr | 0.45±0.08bc  | 0.7±0.07a   | 0.49±0.09b  | 0.29±0.05c | 0.55±0.16ab | 0.42±0.09bc  |
| Li | 1.12±0.13b   | 0.74±0.08c  | 0.95±0.05bc | 1.57±0.27a | 1.58±0.32a  | 1.08±0.1b    |
| Cd | 0.22±0.03b   | 0.66±0.06a  | 0.74±0.31a  | 0.83±0.2a  | 0.62±0.16a  | 0.64±0.09a   |
| Cs | 1.23±0.12a   | 0.89±0.04a  | 0.91±0.04a  | 0.88±0.26a | 0.91±0.35a  | 1.1±0.48a    |
| Ba | 0.44±0.13ab  | 0.63±0.13a  | 0.49±0.1ab  | 0.3±0.08b  | 0.44±0.16ab | 0.43±0.04ab  |

Note: Different letters in the same row indicate statistically significantly different ( $P < 0.05$ ).
